# Supplementary material for: Fe-assisted Ru clusters supported on porous and graphitic carbon for ammonia decomposition to COx free hydrogen
Source: Royal Society of Chemistry journal article supplement (doi:10.1039/c6ra21211e), 2016-01-01
Supplement: c6ra21211e1.pdf [file c6ra21211e1.pdf]

## Fe-assisted Ru clusters supported on porous and graphitic carbon for ammonia decomposition to CO<sub>x</sub> free hydrogen

L. Li, <sup>a\*</sup> F. Chen, <sup>b</sup> Y. Dai, <sup>a</sup> J. Wu, <sup>a</sup> J. L. Shao <sup>a</sup> and H. Y. Li <sup>a</sup>

<sup>a</sup> School of Chemistry and Chemical Engineering, Yancheng institute of technology, Jiangsu, 224051

<sup>b</sup> School of Chemical Biology and Materials Engineering, Suzhou university of science and technology, Jiangsu, 215009

Table S1 XPS studies performed on two different ruthenium catalysts: peak integration of the 2p Fe and 3d Ru features.

| Samples                 | % Fe 2p | % Ru 3d | % C 1s | % O 1s | Fe/Ru |
|-------------------------|---------|---------|--------|--------|-------|
| <b>Ru/Fe-C</b>          | 0.69    | 0.57    | 94.27  | 4.47   | 1.21  |
| <b>Ru/C<sup>#</sup></b> | 0.53    | 0.43    | 94.83  | 4.22   | 1.23  |

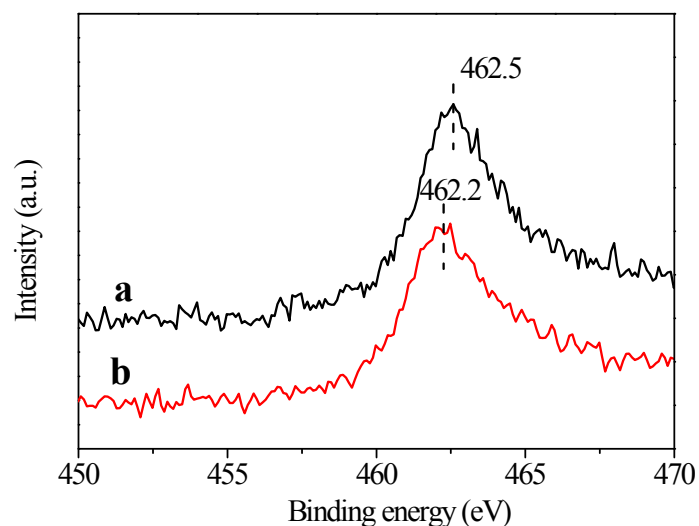

Fig.S1 XPS spectra of the ruthenium 3p<sub>3/2</sub> region of (a) Ru/Fe-C; (b) Ru/C<sup>#</sup>.

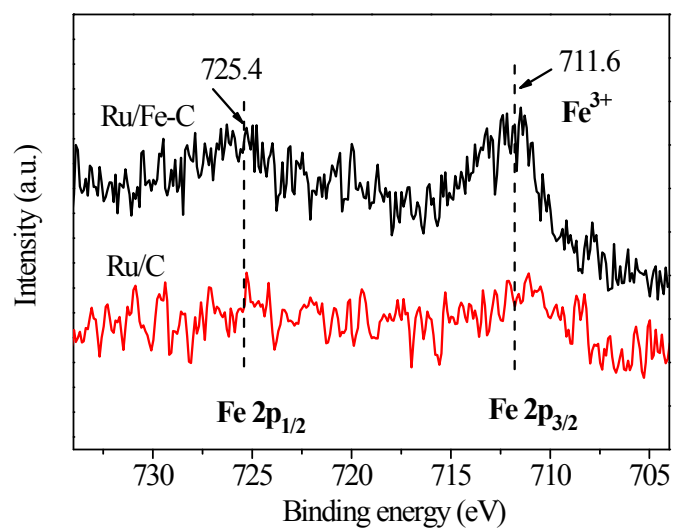

Fig. S2 XPS spectra of the iron 2p region of Ru/Fe-C and Ru/C<sup>#</sup> samples.

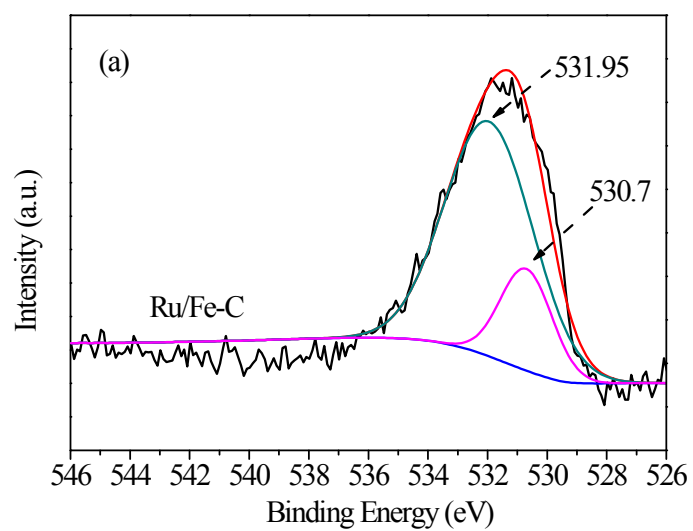

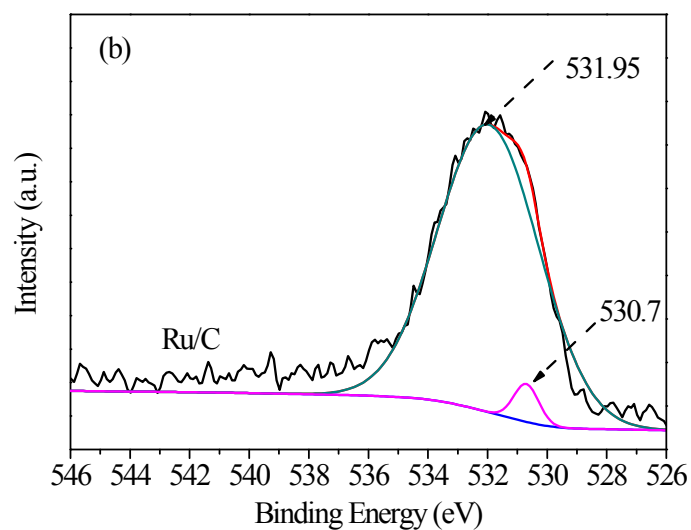

Fig. S3 O1s XPS spectra of (a) Ru/Fe-C and (b) Ru/C<sup>#</sup> catalysts.

Table S2 Comparison of the catalytic performance of Ru/Fe-C with several typical Ru-based carbon supported ammonia decomposition catalysts

| Catalyst                       | Temperatur<br>e<br>(°C) | GHSV<br>(ml h <sup>-1</sup><br>g <sub>cat</sub> <sup>-1</sup> ) | Conversion<br>(%) | H <sub>2</sub><br>production<br>rate (mmol<br>min <sup>-1</sup> g <sub>cat</sub> <sup>-1</sup> ) | Referenc<br>e |
|--------------------------------|-------------------------|-----------------------------------------------------------------|-------------------|--------------------------------------------------------------------------------------------------|---------------|
| <b>Ru/CMK-3</b>                | 550                     | 30,000                                                          | 22.7              | 7.0                                                                                              | 1             |
| <b>Ru/activated<br/>carbon</b> | 550                     | 30,000                                                          | 14.4              | 4.4                                                                                              | 2             |
| <b>Ru/CNTs</b>                 | 550                     | 30,000                                                          | 84.7              | 26.0                                                                                             | 2             |
| <b>Ru/CNTs</b>                 | 500                     | 30,000                                                          | 84.65             | 28.35                                                                                            | 3             |
| <b>Ru/CNTs</b>                 | 450                     | 30,000                                                          | 43.7              | 14.6                                                                                             | 4             |
| <b>K-Ru/CNTs</b>               | 450                     | 30,000                                                          | 97.3              | 32.6                                                                                             | 4             |
| <b>CS-Ru/graphene</b>          | 450                     | 30,000                                                          | 85.8              | 28.7                                                                                             | 5             |
| <b>Ru/CNTs</b>                 | 450                     | 20,000                                                          | 11.3              | 2.5                                                                                              | 6             |
| <b>Ru/CTF-1</b>                | 450                     | 20,000                                                          | 18.2              | 4.1                                                                                              | 6             |
| <b>Ru/Fe-C</b>                 | 450                     | 20,000                                                          | 13.7              | 3.1                                                                                              | This study    |

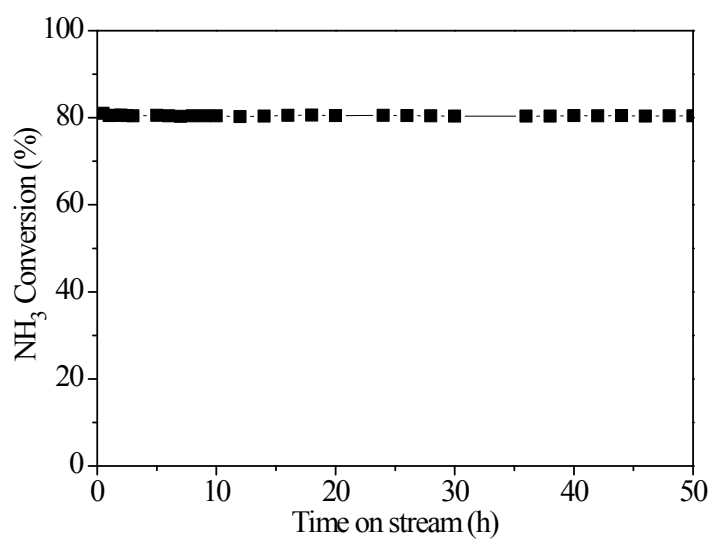

Fig. S4 Time course of ammonia decomposition at 550 °C using Ru/Fe-C as a catalyst.

GHSV= 20 000 ml h<sup>-1</sup> g<sub>cat</sub><sup>-1</sup>.

## References

1. L. Li, Z. H. Zhu, G. Q. Lu, Z. F. Yan and S. Z. Qiao, *Carbon*, 2007, **45**, 11–20.
2. L. Li, Z. H. Zhu, Z. F. Yan, G. Q. Lu and L. Rintoul, *Appl. Catal., A*, 2007, **320**, 166–172.
3. S. F. Yin, Q. H. Zhang, B. Q. Xu, W. X. Zhu, C. F. Ng and C. T. Au, *J. Catal.*, 2004, **224**, 384–396.
4. S. F. Yin, B. Q. Xu, C. F. Ng and C. T. Au, *Appl. Catal., B*, 2004, **48**, 237.
5. G. Li, H. Nagasawa, M. Kanezashi, T. Yoshiok and T. Tsuru, *J. Mater. Chem. A*, 2014, **2**, 9185–9192.
6. F. Chang, J. P. Guo, G. T. Wu, L. Liu, M. Zhang, T. He, P. K. Wang, P. Yu and P. Chen, *RSC Adv.*, 2015, **5**, 3605–3610.
